# Supplementary material for: Improving the wettability and thermal resistance of polypropylene separators with a thin inorganic–organic hybrid layer stabilized by polydopamine for lithium ion batteries
Source: Royal Society of Chemistry journal article supplement (doi:10.1039/c4ra01713g), 2014-01-01
Supplement: c4ra01713g1.pdf [file c4ra01713g1.pdf]

†Electronic Supplementary Information (ESI) available. See  
DOI: 10.1039/b000000x/

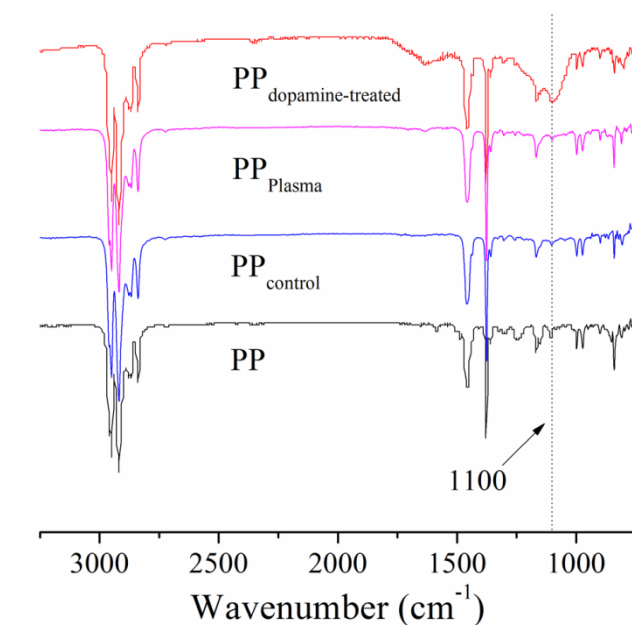

Fig. S1. ATR-FTIR spectra of separators with different treatment conditions.

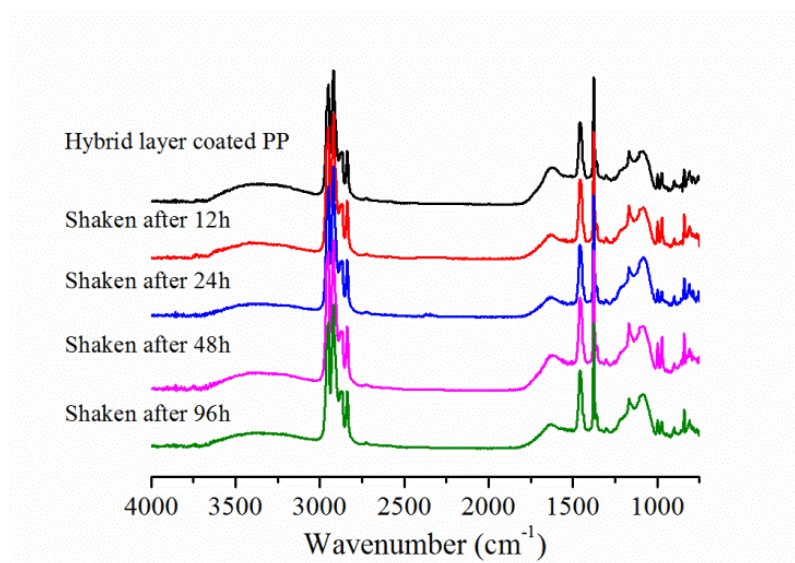

Fig. S2. The ATR-FTIR spectra of hybrid layer coated PP (COI 10.2%) and the separators shaken after 12h, 24h, 48h and 96h, respectively.

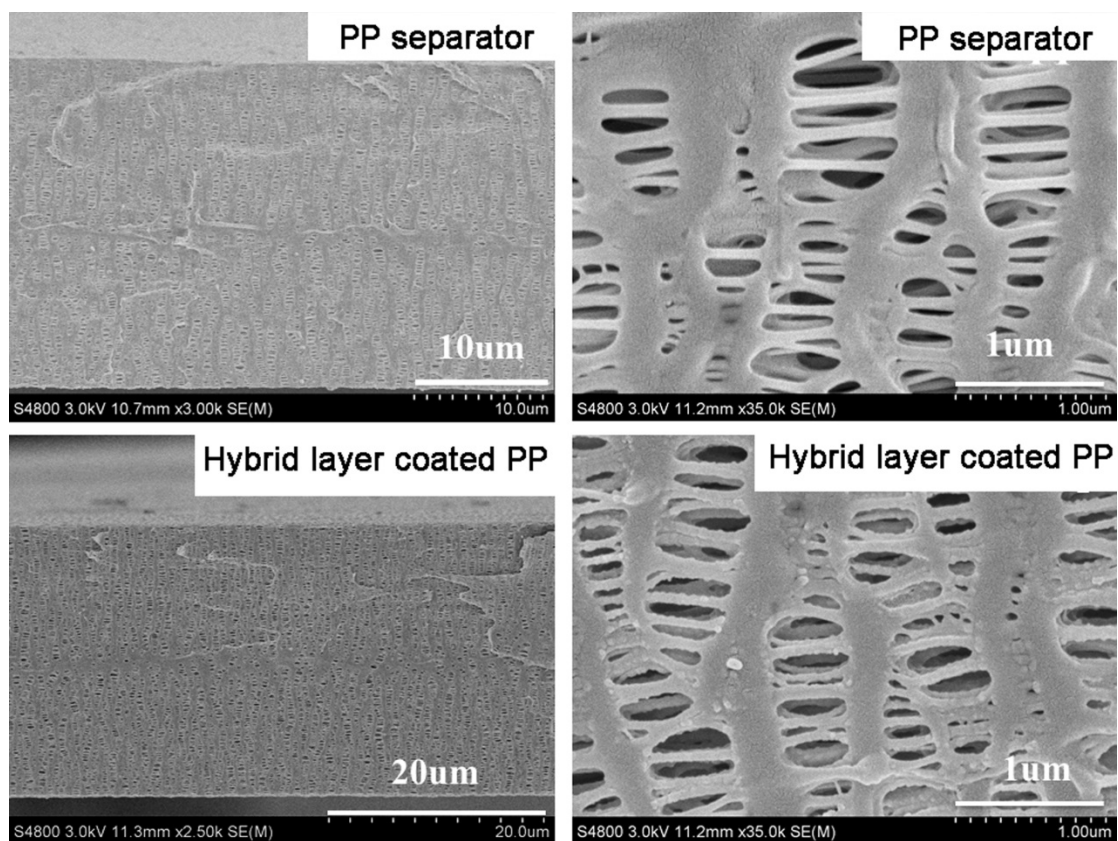

Fig. S3. The cross-section morphologies of the unmodified PP separator and hybrid layer coated PP (*COI*: 11.9%) with different magnifications.

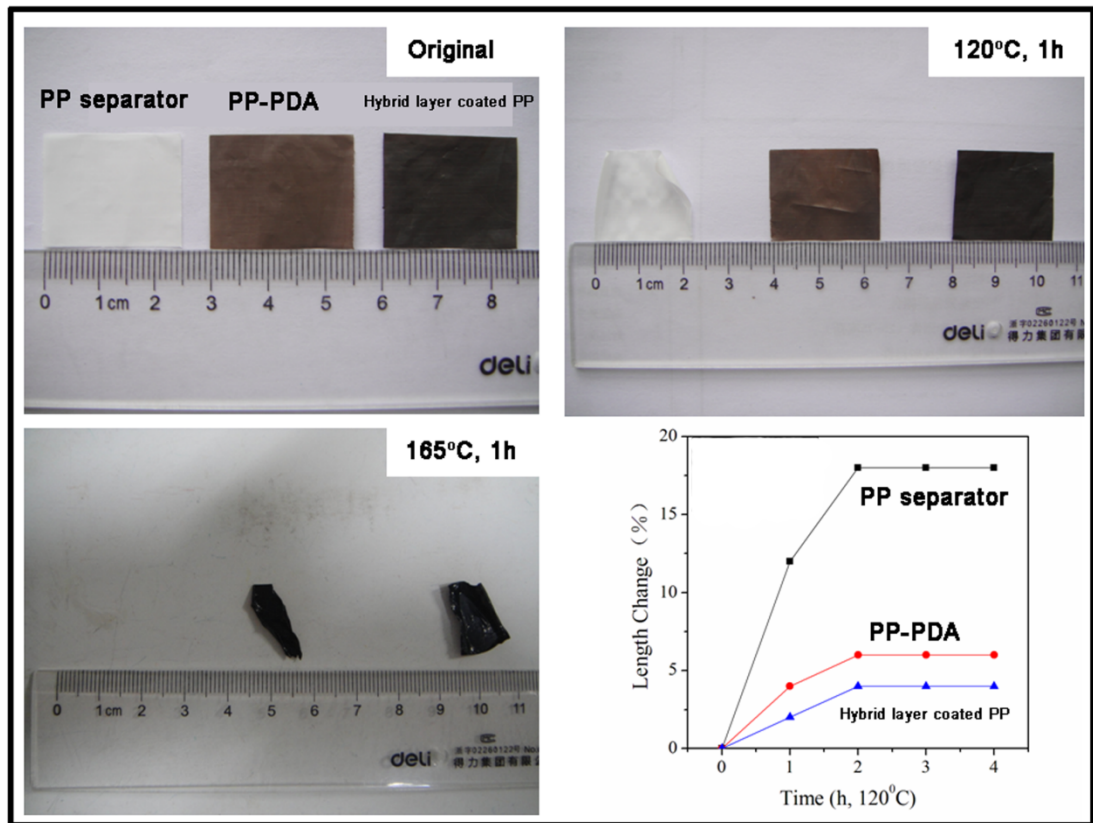

Fig. S4. Comparison of thermal stability of PP separator, PP-PDA and hybrid layer coated PP (*COI*: 11.9%).

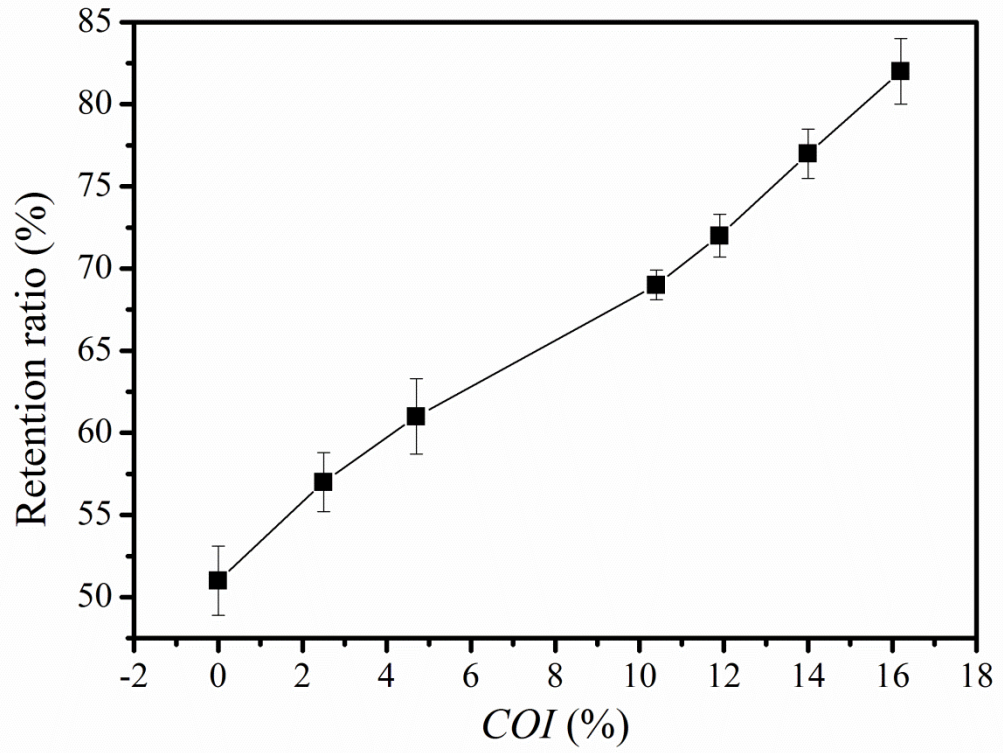

Fig. S4. The retention ratio of the liquid electrolyte for separators after being kept in the sample bags for 6 h.

Table S1

The absorbance at  $1460\text{cm}^{-1}$  and  $1100\text{cm}^{-1}$  of hybrid layer coated PP (*COI* 10.2%) and the separators shaken after 12h, 24h, 48h and 96h, respectively, according to the corresponding ATR-FTIR spectra

| Sample ID              | PH1460 | PH1100 | PH1100/PH1460 |
|------------------------|--------|--------|---------------|
| Hybrid layer coated PP | 0.0218 | 0.0146 | 0.669         |
| Shaken after 12H       | 0.0215 | 0.0146 | 0.679         |
| Shaken after 24H       | 0.0184 | 0.0127 | 0.690         |
| Shaken after 48H       | 0.0241 | 0.0170 | 0.705         |
| Shaken after 96H       | 0.0203 | 0.0145 | 0.714         |

Table S2

The mechanical properties of PP separator, hybrid layer coated PP (*COI* 11.9%) and plasma treated PP separator

| Separator              | Tensile strength (MPa) | Elongation (%) |
|------------------------|------------------------|----------------|
| PP                     | 128.5                  | 76.5           |
| Hybrid layer coated PP | 150.1                  | 96.0           |
| Plasma treated PP      | 110.0                  | 30.6           |
